# Supplementary material for: Binge drinking among adolescents: the role of stress, problematic internet use, and emotional regulation
Source: PeerJ journal article supplement (doi:10.7717/peerj.18479), 2024-11-27
Supplement: RAW_DATA_PEERJ.xlsx [file RAW_DATA_PEERJ.xlsx]

## Sheet: Hoja1
Gender	Age	PSS	TMMS	GAD	SBQ	IMP	CERM	TOTAL CN	SBQRISK
1	22	28	14	3	5	17	14	0	0
1	21	28	24	6	7	19	14	0	1
1	22	19	31	2	10	21	17	1	1
0	25	15	34	1	4	10	12	0	0
1	22	23	25	5	5	31	16	0	0
1	25	20	18	2	5	18	12	0	0
1	25	19	31	4	4	17	23	0	0
1	23	9	33	1	4	19	10	0	0
1	25	23	28	2	4	18	17	1	0
1	25	20	28	3	4	24	13	0	0
1	21	20	32	2	4	15	13	0	0
0	21	26	36	2	6	29	24	0	0
1	21	29	15	2	6	15	19	0	0
0	21	15	29	3	4	13	11	1	0
1	21	24	20	4	4	29	19	0	0
1	22	24	21	3	5	17	16	0	0
1	21	23	18	4	6	15	22	0	0
1	20	22	29	3	6	22	22	0	0
1	23	22	22	1	5	26	15	0	0
1	22	22	17	2	7	14	15	0	1
0	24	21	33	0	5	24	18	1	0
0	24	21	27	0	5	23	19	2	0
0	23	18	23	1	5	21	16	1	0
1	25	14	27	2	4	19	20	5	0
0	21	23	27	6	4	25	21	1	0
1	21	27	27	2	6	16	18	1	0
1	20	23	30	1	4	24	15	0	0
0	18	21	33	4	4	21	21	0	0
1	18	18	24	5	16	22	19	7	1
0	17	29	26	5	6	21	25	4	0
0	19	25	27	2	4	15	15	0	0
1	20	21	22	4	5	16	16	0	0
1	17	24	17	3	8	26	28	0	1
1	17	28	22	2	7	24	26	0	1
1	21	17	34	1	13	11	14	0	1
1	16	23	17	2	4	17	19	1	0
1	16	15	28	2	4	14	14	0	0
3	20	34	13	3	4	21	22	0	0
1	16	25	34	6	4	25	21	1	0
1	23	21	26	3	4	20	22	0	0
1	22	20	15	2	5	17	19	0	0
0	18	18	28	3	4	15	15	0	0
1	16	19	24	1	5	25	17	0	0
1	19	20	26	2	4	14	12	0	0
0	16	34	35	5	7	35	36	9	1
0	17	15	32	4	9	28	24	1	1
0	17	22	31	3	6	26	27	0	0
0	18	23	30	1	4	21	20	1	0
0	16	16	28	2	4	26	23	0	0
1	23	17	33	1	4	19	17	0	0
1	23	23	30	3	5	23	19	0	0
1	19	23	23	4	5	23	29	8	0
1	19	23	23	3	4	19	17	1	0
1	19	22	23	5	5	20	20	1	0
0	22	24	20	2	7	19	21	0	1
0	21	25	40	1	4	22	17	0	0
1	18	24	32	4	4	24	27	4	0
1	21	17	34	0	4	22	15	0	0
1	16	23	17	2	4	22	27	0	0
1	16	15	28	1	16	21	28	4	1
3	20	34	13	1	11	9	15	6	1
1	16	25	34	6	8	26	22	0	1
1	23	21	26	3	4	22	26	0	0
1	22	20	15	2	4	26	23	1	0
0	18	18	28	3	4	39	29	0	0
1	25	16	37	0	4	13	12	0	0
1	18	20	37	4	6	12	17	1	0
1	18	22	23	3	6	20	18	0	0
1	19	26	39	3	6	21	21	0	0
0	24	25	21	2	8	24	15	0	1
0	25	17	24	1	15	16	13	0	1
0	17	15	30	0	4	12	12	0	0
1	25	14	20	2	4	15	29	0	0
1	19	20	26	1	7	18	19	0	1
0	23	21	26	2	4	31	16	0	0
1	18	25	30	1	6	20	16	0	0
0	18	18	23	1	16	16	16	0	1
1	18	28	27	5	11	31	20	1	1
1	18	34	0	4	13	0	0	1	1
0	22	24	29	3	4	18	0	0	0
1	22	26	17	6	13	34	0	0	1
0	22	20	30	2	4	22	0	0	0
0	18	23	28	1	10	20	0	0	1
0	18	21	21	1	14	28	0	0	1
1	22	22	30	3	6	24	0	0	0
1	22	16	30	1	4	15	0	0	0
1	18	23	25	6	9	21	0	0	1
0	18	6	26	0	4	12	0	0	0
1	22	24	13	6	16	24	0	0	1
1	22	27	24	3	15	29	0	0	1
0	25	26	23	2	9	23	0	6	1
1	20	29	26	3	4	18	0	0	0
0	25	21	35	4	4	22	0	0	0
1	22	28	24	6	11	19	0	4	1
1	20	22	34	1	5	27	0	6	0
0	19	25	17	6	5	30	0	0	0
1	20	18	25	3	4	23	0	6	0
1	20	28	39	6	7	33	0	0	1
1	22	20	20	6	12	20	0	0	1
3	20	16	12	3	10	34	0	3	1
1	22	27	24	6	11	16	0	0	1
1	19	23	25	6	8	27	0	0	1
1	19	22	32	5	8	14	0	0	1
1	18	30	25	6	10	28	0	0	1
1	19	21	18	3	10	18	0	0	1
0	19	30	33	6	4	36	0	0	0
0	18	19	30	2	4	17	0	0	0
1	18	30	18	6	4	38	0	0	0
1	18	23	19	3	6	20	0	0	0
1	22	22	29	3	5	17	0	0	0
1	22	19	29	2	4	20	0	0	0
1	20	28	20	4	4	20	0	0	0
1	20	24	15	4	12	30	0	0	1
1	21	17	34	4	12	14	0	6	1
1	19	21	23	0	10	19	0	0	1
0	22	19	28	1	4	13	0	0	0
0	20	18	30	6	4	29	0	0	0
1	22	23	23	6	11	22	0	0	1
1	22	23	15	6	17	18	0	0	1
1	19	26	34	3	6	24	0	0	0
1	19	17	24	3	6	21	0	0	0
0	21	17	27	1	4	19	0	0	0
1	21	16	15	1	12	25	0	0	1
1	19	14	34	4	5	18	0	3	0
1	22	22	30	6	4	25	0	0	0
1	20	8	26	6	4	29	0	0	0
1	19	25	31	4	9	26	0	0	1
3	25	22	26	3	5	22	0	6	0
0	24	20	32	2	4	22	0	6	0
1	25	20	27	2	10	20	0	0	1
1	19	19	34	3	7	24	0	0	1
1	19	25	26	2	8	21	0	0	1
1	21	17	22	4	10	20	0	0	1
1	18	27	25	4	10	23	0	0	1
0	20	30	15	4	12	28	0	0	1
1	18	20	33	3	4	14	0	6	0
1	22	21	29	2	4	18	0	0	0
1	20	23	33	2	5	16	0	0	0
1	19	19	28	1	5	24	0	0	0
0	20	22	17	3	5	22	0	0	0
1	22	24	32	0	7	25	0	0	1
0	24	14	30	0	6	19	0	0	0
0	25	28	19	2	9	28	0	0	1
0	25	20	23	3	6	22	0	0	0
1	24	22	32	1	5	21	0	0	0
0	20	22	20	2	6	12	0	0	0
3	21	15	28	1	16	18	0	0	1
1	22	30	16	4	13	21	0	1	1
0	20	19	27	0	6	29	0	0	0
3	22	27	27	5	4	24	0	3	0
0	21	21	24	3	7	24	0	0	1
0	25	20	28	1	12	18	0	0	1
1	25	25	26	6	7	27	0	0	1
1	20	24	15	6	17	21	0	0	1
0	25	31	28	1	4	19	0	0	0
0	25	20	30	0	4	27	0	0	0
1	25	29	19	6	18	20	0	6	1
0	25	24	31	2	5	16	0	0	0
1	24	21	25	6	6	32	0	0	0
1	22	14	16	1	16	31	0	0	1
1	20	27	25	6	17	30	0	0	1
1	21	25	27	4	15	22	0	0	1
1	24	21	34	5	15	29	0	1	1
1	22	27	18	5	9	21	0	0	1
1	21	16	28	2	10	16	0	0	1
1	21	24	24	6	5	18	0	0	0
1	22	20	23	1	4	15	0	0	0
1	22	26	27	3	5	18	0	0	0
1	19	24	18	2	5	20	0	0	0
0	25	25	19	5	6	14	0	0	0
1	25	24	27	1	6	18	0	0	0
0	17	17	33	2	8	25	0	0	1
1	18	27	15	2	6	19	0	0	0
1	18	29	31	2	4	18	0	0	0
1	18	18	33	0	4	15	0	0	0
1	17	22	29	2	5	16	0	0	0
0	18	14	30	2	9	13	0	0	1
1	18	16	29	1	10	21	0	6	1
3	20	29	20	2	20	31	0	0	1
1	19	26	22	5	10	22	0	6	1
0	25	26	23	1	4	18	0	5	0
1	22	21	19	2	7	21	0	0	1
1	24	26	23	5	6	21	0	0	0
1	20	17	29	6	7	25	0	0	1
1	21	26	21	3	6	15	0	0	0
1	18	26	19	5	8	23	0	6	1
1	22	25	30	3	6	13	0	0	0
0	24	23	25	3	13	21	0	0	1
0	22	22	29	2	5	11	0	0	0
1	20	20	28	4	4	19	0	0	0
1	20	29	17	5	4	29	0	0	0
1	20	21	28	4	4	19	0	0	0
1	25	27	29	3	9	32	0	0	1
0	18	23	21	2	7	23	0	0	1
1	18	26	23	4	8	21	16	9	1
1	18	24	21	4	4	24	21	1	0
1	18	30	36	6	13	27	22	0	1
1	21	27	26	3	8	24	19	1	1
1	18	25	20	6	16	19	31	1	1
0	21	20	27	2	5	25	22	7	0
1	19	22	24	4	6	23	20	0	0
1	19	26	22	3	17	29	13	0	1
1	20	19	32	4	6	23	13	0	0
1	18	24	31	2	13	18	21	0	1
1	19	17	36	3	5	17	15	1	0
1	18	19	30	3	4	19	18	0	0
1	19	26	17	4	4	21	18	5	0
1	18	20	17	3	11	20	27	1	1
0	20	25	29	3	11	17	11	1	1
1	18	26	19	5	12	18	20	0	1
1	19	24	17	6	12	35	24	0	1
1	18	27	12	4	5	27	25	1	0
1	19	24	34	3	5	16	17	0	0
1	25	21	26	4	7	17	23	0	1
1	20	23	30	2	7	23	15	0	1
1	20	21	24	5	7	20	22	2	1
1	20	22	28	3	5	15	23	1	0
0	20	24	29	2	6	26	27	2	0
1	24	15	27	3	8	15	17	0	1
1	21	23	23	4	6	15	15	1	0
1	22	18	26	2	6	24	22	1	0
1	20	22	19	3	6	16	21	0	0
1	21	24	24	5	6	16	15	0	0
1	20	20	28	1	4	14	16	0	0
1	22	22	22	2	4	29	22	0	0
0	18	23	35	2	6	21	18	1	0
1	21	22	31	2	6	16	15	0	0
1	21	25	26	1	4	13	19	0	0
1	21	21	25	3	5	21	22	1	0
1	18	26	26	4	7	28	16	0	1
1	20	18	27	4	12	15	14	1	1
1	19	29	23	4	7	26	28	7	1
1	18	26	19	4	13	20	16	0	1
1	25	19	31	2	7	25	16	7	1
1	22	23	37	3	4	21	16	0	0
1	20	24	31	3	6	21	23	0	0
3	18	27	39	2	13	25	12	0	1
0	20	17	28	0	8	16	17	1	1
1	20	32	39	4	4	27	22	0	0
0	18	20	35	1	4	19	15	0	0
1	23	20	26	3	10	11	22	0	1
1	19	24	22	5	15	19	13	1	1
1	18	27	35	2	8	22	24	0	1
1	19	19	31	2	4	15	18	0	0
1	18	20	32	2	4	21	19	1	0
1	18	28	19	2	5	18	20	0	0
1	23	18	24	3	4	29	17	0	0
1	25	22	29	1	11	19	12	0	1
1	18	21	25	2	4	24	21	1	0
1	24	27	24	6	9	20	14	1	1
1	25	23	28	1	4	23	15	1	0
1	19	27	19	5	7	21	25	0	1
3	22	19	17	3	4	15	19	0	0
1	19	18	37	4	4	24	13	0	0
1	18	24	24	3	4	19	22	0	0
1	23	17	30	3	7	21	15	1	1
1	19	21	26	1	4	19	19	0	0
1	20	22	31	2	4	20	19	1	0
1	20	15	26	3	6	18	14	0	0
1	18	21	25	1	5	13	14	0	0
0	18	18	26	3	9	20	18	0	1
0	18	19	23	2	11	15	15	5	1
1	18	18	24	2	5	15	16	1	0
1	18	21	25	1	6	19	15	0	0
1	19	21	20	2	5	32	26	0	0
1	19	26	18	6	13	29	24	7	1
1	18	19	28	3	10	16	15	0	1
1	19	17	36	1	5	17	20	0	0
1	18	22	27	3	6	24	17	2	0
1	21	20	31	2	6	22	21	0	0
1	24	24	20	2	6	16	26	0	0
1	19	25	30	4	4	23	17	0	0
1	25	22	21	1	5	21	10	3	0
1	19	21	19	3	4	24	15	1	0
3	25	19	29	2	9	25	17	0	1
1	25	32	31	3	9	16	11	0	1
1	22	27	18	5	4	12	15	0	0
1	22	26	20	5	9	21	18	2	1
1	21	27	21	2	4	14	16	0	0
1	20	32	16	6	12	29	25	1	1
0	25	26	31	2	4	18	13	1	0
1	20	26	40	2	8	28	21	0	1
1	22	24	29	3	4	22	26	0	0
0	25	26	25	3	4	17	13	1	0
0	25	9	35	1	6	16	21	0	0
1	25	23	37	3	5	17	12	1	0
1	25	26	20	6	19	21	14	1	1
1	24	23	19	4	11	19	13	1	1
1	25	29	28	5	7	30	17	0	1
1	22	29	25	5	17	26	20	0	1
1	22	22	23	3	4	11	18	1	0
1	20	24	26	5	11	25	19	0	1
0	19	25	20	6	12	28	19	0	1
1	20	20	26	3	5	16	15	0	0
1	19	28	27	5	5	23	16	0	0
1	22	26	22	4	10	15	21	1	1
1	25	25	19	6	12	17	11	0	1
1	25	26	31	5	8	31	14	0	1
1	19	17	27	2	4	18	13	1	0
1	24	26	27	3	6	20	28	0	0
1	22	20	33	2	4	17	21	0	0
1	20	22	38	3	6	31	17	1	0
1	19	20	22	2	7	23	19	1	1
1	22	20	37	2	6	17	16	1	0
1	22	28	23	6	8	32	20	1	1
1	21	17	14	2	4	25	21	0	0
1	25	21	35	1	4	16	11	0	0
1	19	26	27	2	4	18	16	0	0
1	23	31	33	2	4	21	14	1	0
1	19	18	26	5	7	23	16	1	1
1	24	23	28	3	7	22	17	0	1
1	23	19	28	1	4	18	13	0	0
1	20	31	37	2	5	21	14	0	0
1	25	17	34	2	6	19	14	0	0
1	21	27	20	4	5	19	20	0	0
1	19	25	31	3	6	17	22	0	0
1	20	24	26	3	5	20	21	0	0
1	19	25	32	3	4	23	13	1	0
1	21	22	22	3	4	17	19	0	0
1	18	21	26	4	4	32	19	0	0
0	20	17	32	1	4	18	13	0	0
0	25	19	18	1	5	25	19	0	0
1	24	20	19	4	5	17	16	0	0
1	19	24	35	3	4	13	14	0	0
1	18	27	36	2	7	32	21	0	1
1	19	23	22	3	8	19	26	0	1
0	25	27	22	6	13	21	20	1	1
1	22	21	36	2	4	19	16	0	0
1	20	20	35	2	6	17	13	0	0
0	25	20	36	2	4	12	11	2	0
1	25	22	29	2	6	22	15	0	0
1	21	26	18	6	15	24	24	0	1
1	19	24	24	3	6	16	24	0	0
0	21	20	23	2	14	20	14	1	1
1	20	25	20	4	7	23	21	0	1
1	22	28	29	4	5	32	32	0	0
1	22	29	37	2	11	25	25	0	1
0	23	26	35	3	8	29	15	9	1
1	25	27	23	4	10	21	16	1	1
1	18	29	33	6	8	27	19	1	1
1	23	20	19	3	6	19	24	1	0
1	23	26	22	6	4	14	21	1	0
0	21	22	15	2	5	20	21	1	0
1	18	24	23	3	5	20	19	1	0
1	21	17	38	2	4	20	13	0	0
1	21	18	28	1	6	14	14	0	0
1	21	29	29	4	6	17	17	1	0
0	17	15	26	1	6	13	15	0	0
1	20	23	25	4	12	17	16	0	1
1	20	22	21	3	7	15	15	0	1
1	20	20	25	3	4	19	22	0	0
0	18	15	27	1	8	15	16	0	1
1	18	25	18	5	12	19	19	0	1
1	18	23	25	5	5	21	19	0	0
1	18	21	23	4	4	27	23	0	0
0	18	20	27	2	6	20	21	0	0
1	18	17	19	4	4	20	20	0	0
1	18	22	31	3	6	21	21	0	0
1	19	20	15	4	18	25	20	0	1
1	18	25	27	6	7	26	22	2	1
1	17	24	27	3	6	27	19	1	0
1	25	28	32	4	5	16	16	0	0
1	18	16	29	1	4	13	14	0	0
1	20	24	29	6	13	35	14	1	1
1	18	23	25	3	8	17	19	1	1
1	21	29	30	4	4	30	25	1	0
1	21	20	20	3	4	22	12	4	0
3	22	19	25	3	17	17	15	10	1
1	23	23	30	2	16	14	13	2	1
1	20	21	40	2	5	19	23	4	0
1	24	26	29	4	5	31	22	4	0
1	21	26	27	4	8	19	16	7	1
1	22	21	32	4	5	22	15	1	0
1	23	25	26	2	4	12	14	0	0
1	20	26	11	6	9	27	15	0	1
1	22	24	8	6	9	30	35	0	1
1	21	25	21	6	7	29	26	0	1
1	23	30	28	3	4	13	12	0	0
1	21	24	17	4	11	26	18	10	1
1	21	19	22	1	4	24	16	0	0
1	22	27	38	2	6	20	20	1	0
1	23	28	33	2	4	21	15	0	0
0	22	28	38	2	5	25	22	0	0
0	21	20	28	3	11	22	17	10	1
1	24	22	29	1	4	13	15	0	0
1	23	26	24	2	7	17	19	0	1
1	23	20	33	6	14	23	27	0	1
1	21	19	33	1	4	22	17	0	0
1	18	22	26	3	7	19	21	4	1
0	24	10	25	0	4	29	10	5	0
1	21	16	34	0	9	16	16	4	1
1	21	20	14	0	7	15	14	0	1
1	23	23	18	3	4	19	22	0	0
1	22	21	22	3	6	23	20	0	0
1	20	20	25	1	6	26	19	0	0
0	23	25	31	1	4	19	14	0	0
1	22	24	29	1	6	26	20	0	0
0	25	22	37	1	4	18	11	9	0
1	20	23	28	5	4	10	14	2	0
1	20	26	27	3	6	24	16	3	0
0	22	22	37	2	4	22	14	1	0
1	20	25	34	5	5	29	15	7	0
1	24	17	28	2	13	17	14	0	1
1	23	28	18	4	4	22	12	0	0
1	23	25	14	5	11	30	15	0	1
1	22	24	9	6	14	26	24	1	1
1	20	24	14	6	18	32	20	0	1
1	20	21	23	2	4	24	17	4	0
1	20	22	17	3	4	28	29	0	0
1	20	22	18	4	9	29	13	4	1
1	19	22	16	4	7	17	21	0	1
1	19	24	18	4	9	18	22	5	1
1	19	18	22	5	6	18	18	0	0
1	20	13	25	0	5	23	23	1	0
1	24	23	30	4	14	15	12	2	1
1	19	19	24	1	5	25	21	0	0
1	19	20	21	0	4	20	14	1	0
1	20	26	31	5	4	22	17	3	0
0	20	19	37	2	4	26	20	0	0
1	24	19	19	4	7	20	16	4	1
1	23	22	17	4	15	23	21	0	1
1	20	18	23	2	6	20	17	0	0
1	22	23	14	4	4	15	13	0	0
1	21	24	19	2	4	17	17	0	0
1	19	24	28	2	4	17	22	0	0
1	20	24	34	5	4	23	21	1	0
1	20	21	30	3	4	24	13	6	0
1	20	23	33	2	11	25	18	4	1
1	24	22	24	5	4	24	13	6	0
1	25	16	29	2	5	22	14	0	0
1	22	32	21	6	6	22	17	0	0
1	23	23	22	5	6	19	19	4	0
1	24	19	20	2	6	16	12	0	0
1	20	27	30	3	6	18	14	0	0
1	22	28	24	4	9	23	19	0	1
0	19	27	26	4	10	19	16	0	1
1	24	24	21	6	7	19	15	10	1
1	22	21	32	2	5	17	22	0	0
1	21	23	23	6	17	17	21	2	1
1	22	27	25	4	17	27	28	0	1
1	25	17	26	1	4	12	12	0	0
1	20	28	38	5	14	21	17	1	1
1	22	17	26	1	9	28	17	3	1
1	20	27	32	4	5	27	18	0	0
1	19	23	24	3	6	19	17	0	0
1	24	18	40	1	4	24	13	0	0
1	20	24	29	4	10	17	18	0	1
1	21	24	26	2	8	22	15	1	1
0	20	15	35	0	4	18	19	8	0
1	22	26	28	4	4	15	22	0	0
1	25	25	22	3	9	13	16	1	1
1	23	18	22	0	4	19	12	0	0
1	20	23	24	1	4	27	21	0	0
1	19	30	22	4	4	18	15	4	0
1	19	22	24	3	8	18	16	0	1
1	21	24	19	2	6	16	14	0	0
1	22	25	28	5	5	20	13	0	0
1	25	23	28	3	4	18	14	0	0
1	25	23	19	3	13	35	16	0	1
1	22	25	23	3	7	36	27	1	1
1	20	25	33	5	4	27	18	0	0
1	25	30	21	5	13	28	31	0	1
0	20	24	22	2	9	22	25	0	1
1	19	24	18	2	8	26	22	1	1
1	22	22	24	6	8	24	17	10	1
1	23	26	27	3	9	29	24	1	1
0	22	21	29	2	7	20	16	0	1
1	19	20	27	2	6	29	18	0	0
1	21	19	33	1	5	18	19	0	0
1	20	21	24	2	6	26	17	0	0
1	22	29	21	0	4	17	13	0	0
1	23	20	31	1	7	24	22	7	1
1	20	24	19	5	11	35	22	7	1
1	21	25	29	2	4	19	20	1	0
1	24	23	21	4	6	19	22	0	0
1	23	24	26	2	4	22	13	1	0
0	24	12	33	2	4	21	22	0	0
1	22	23	36	1	15	17	12	0	1
1	25	23	28	5	10	26	19	7	1
1	22	27	25	1	4	14	17	0	0
1	20	28	20	3	4	31	11	0	0
1	22	26	22	2	7	15	16	1	1
1	21	19	20	3	5	17	20	0	0
1	20	31	22	2	4	11	16	0	0
1	25	11	31	1	9	17	13	1	1
1	21	37	24	6	4	20	12	0	0
1	20	27	28	3	7	17	14	0	1
1	21	28	15	3	5	37	20	0	0
1	22	17	37	2	5	18	13	0	0
1	22	23	23	2	4	18	16	1	0
1	21	23	34	6	4	17	15	0	0
1	20	29	27	2	8	24	19	1	1
0	20	25	30	3	10	17	18	10	1
1	23	23	26	3	5	19	16	0	0
1	21	21	20	3	4	18	24	0	0
1	25	21	18	4	7	12	17	0	1
1	19	22	39	0	4	21	21	4	0
1	21	23	25	2	4	15	13	0	0
1	22	20	33	0	8	17	13	0	1
1	20	27	32	4	4	20	12	10	0
1	20	23	19	3	4	22	19	0	0
1	22	27	29	5	10	26	24	1	1
1	20	22	32	3	4	22	17	0	0
1	23	22	28	2	5	15	20	5	0
1	23	29	23	3	8	23	12	2	1
1	20	29	25	6	5	23	17	7	0
1	20	25	33	1	4	19	14	0	0
1	20	22	29	2	4	21	13	0	0
0	24	18	30	2	6	24	16	3	0
0	20	18	32	2	5	17	18	7	0
1	25	24	24	4	5	20	20	0	0
1	21	29	22	3	11	32	22	1	1
1	24	25	31	4	11	20	13	1	1
1	22	19	10	2	4	23	23	2	0
1	20	24	14	4	15	28	21	0	1
1	21	28	14	6	11	17	21	0	1
1	20	25	28	3	5	26	16	0	0
1	20	20	22	2	7	23	24	0	1
3	25	24	27	4	16	18	13	2	1
1	23	21	24	3	6	21	15	1	0
1	20	19	32	3	5	15	23	6	0
1	19	32	16	6	8	27	18	4	1
1	22	22	28	2	5	18	15	0	0
1	22	24	32	2	6	26	18	1	0
1	20	20	23	5	6	17	21	4	0
1	21	21	25	3	7	30	29	1	1
1	23	22	29	2	11	18	25	10	1
1	23	17	24	3	7	26	20	0	1
1	22	29	21	4	9	31	27	0	1
1	20	21	26	2	6	20	19	0	0
1	20	20	29	2	4	17	15	0	0
1	19	28	31	5	6	19	19	8	0
1	20	24	24	4	5	28	23	1	0
1	23	23	16	2	8	20	13	0	1
1	19	21	23	5	10	30	19	7	1
1	20	18	25	2	4	20	15	0	0
1	20	22	17	4	4	26	17	5	0
1	20	25	21	2	9	18	20	0	1
1	19	23	19	3	14	19	17	6	1
1	25	21	22	1	4	23	22	10	0
1	22	24	39	2	6	19	14	0	0
1	23	28	26	2	4	28	22	0	0
1	19	25	14	6	5	25	16	7	0
1	22	24	17	5	15	17	15	0	1
1	25	24	25	4	4	25	16	0	0
1	23	23	23	2	5	14	12	0	0
0	23	24	27	5	5	18	17	0	0
1	22	31	14	6	4	27	28	0	0
1	21	23	30	1	4	16	16	0	0
1	22	25	26	3	14	25	18	1	1
1	20	21	16	2	7	22	20	0	1
1	20	26	17	4	10	33	15	2	1
1	22	17	23	3	6	21	25	1	0
1	21	29	26	5	4	23	16	1	0
1	20	24	25	3	5	24	17	4	0
0	21	23	28	2	5	18	14	4	0
1	20	16	21	1	4	21	28	0	0
1	24	22	15	4	7	23	16	0	1
1	20	32	15	6	13	21	12	7	1
1	20	20	19	2	5	26	21	4	0
1	23	28	26	5	6	26	22	0	0
1	20	27	21	3	8	23	25	3	1
1	20	21	32	2	4	14	12	1	0
0	22	29	25	4	4	20	17	2	0
1	22	18	19	2	4	11	16	0	0
1	19	21	19	2	4	17	19	0	0
1	22	22	17	6	13	24	18	0	1
1	19	23	23	2	11	19	14	2	1
3	25	19	28	1	12	18	17	0	1
1	24	26	32	2	7	19	14	0	1
1	20	25	18	5	7	18	11	1	1
1	20	19	20	5	4	20	15	0	0
1	22	26	23	5	8	23	13	0	1
1	20	27	14	6	7	23	18	1	1
1	20	18	31	2	5	21	13	0	0
1	20	22	26	4	8	16	17	1	1
1	20	27	25	1	12	24	26	0	1
1	22	23	29	3	5	17	16	1	0
1	24	22	23	2	7	15	20	0	1
1	23	23	29	3	7	16	16	0	1
1	19	30	32	6	6	33	20	0	0
1	19	18	30	2	4	21	22	1	0
1	21	24	11	6	9	20	30	7	1
1	23	22	26	2	5	15	13	0	0
1	20	20	27	2	9	25	21	0	1
1	22	17	24	3	11	27	24	7	1
1	21	17	18	6	5	17	12	0	0
1	22	20	29	5	7	18	20	1	1
0	25	22	23	2	4	10	10	0	0
1	19	26	28	3	5	22	19	10	0
1	22	22	25	4	15	20	16	1	1
1	23	18	19	2	4	16	12	0	0
1	20	22	24	1	4	23	16	0	0
1	24	20	31	2	6	13	16	1	0
1	20	24	28	6	21	25	19	10	1
1	25	22	23	2	4	20	11	1	0
1	25	17	31	2	4	9	12	0	0
1	23	20	31	2	6	23	18	1	0
0	22	18	25	1	6	22	21	1	0
0	22	15	33	0	4	14	15	1	0
1	25	26	26	6	4	28	26	0	0
0	22	17	32	0	4	15	13	1	0
0	20	25	23	4	17	17	14	1	1
3	20	26	14	4	13	19	20	0	1
1	25	29	20	5	11	27	15	6	1
1	19	17	24	0	4	21	20	0	0
1	20	24	28	2	4	15	18	0	0
1	25	24	38	2	4	26	18	0	0
1	22	18	24	3	5	19	13	1	0
1	25	24	30	2	7	25	24	2	1
1	21	24	17	5	9	14	19	0	1
1	23	21	32	4	4	15	14	0	0
1	20	24	39	3	4	15	15	0	0
1	25	26	24	3	4	19	15	0	0
0	22	19	23	3	17	18	15	1	1
0	25	22	34	2	12	26	20	4	1
1	23	22	27	5	4	22	19	1	0
1	18	20	32	2	4	20	20	0	0
1	18	23	23	6	17	16	20	0	1
1	20	19	21	2	5	13	14	0	0
1	18	24	18	6	7	29	15	0	1
1	19	21	30	2	4	15	16	0	0
1	23	23	24	5	8	20	15	1	1
1	18	25	22	2	11	17	15	0	1
1	25	15	36	1	4	17	12	0	0
1	20	21	28	6	6	27	20	0	0
0	21	25	34	4	14	14	10	1	1
1	18	22	21	4	6	25	17	0	0
1	21	16	16	3	4	12	20	1	0
1	18	28	33	4	12	33	20	1	1
1	21	29	20	1	5	29	17	0	0
1	21	24	22	2	4	24	15	0	0
1	17	25	38	3	5	18	17	0	0
1	18	24	25	3	4	23	18	0	0
1	20	20	20	3	7	19	14	0	1
1	18	25	33	2	6	28	22	1	0
1	20	14	24	0	5	11	15	0	0
3	20	19	13	5	12	22	19	0	1
1	17	16	36	1	5	22	13	0	0
1	20	21	33	1	4	21	12	0	0
1	21	23	15	4	8	26	20	1	1
0	19	19	29	0	4	14	15	0	0
1	17	19	23	2	11	21	16	0	1
1	19	29	29	4	4	31	12	1	0
1	22	27	32	5	8	21	16	1	1
1	17	23	30	2	4	16	18	0	0
0	17	19	23	2	5	11	16	0	0
1	23	19	18	3	5	22	27	0	0
1	25	17	28	1	4	18	13	0	0
1	22	24	18	5	12	31	17	1	1
1	20	20	34	0	6	15	21	0	0
0	19	18	27	2	17	25	20	0	1
0	21	23	35	5	5	19	16	0	0
1	17	26	16	4	9	20	17	1	1
1	25	21	34	1	4	18	11	1	0
1	20	30	37	3	5	21	26	0	0
1	18	20	31	3	6	30	17	1	0
1	19	16	25	5	6	21	16	0	0
1	20	18	29	4	4	21	11	0	0
1	20	25	22	6	6	27	12	1	0
1	20	23	25	4	4	18	18	1	0
1	21	20	29	3	7	24	19	0	1
1	20	26	30	1	6	24	18	0	0
1	23	20	27	5	4	19	14	0	0
1	20	21	24	5	17	22	22	0	1
0	18	18	32	1	6	17	14	0	0
1	25	16	28	2	4	21	13	0	0
1	21	20	21	2	5	25	15	0	0
1	21	27	16	5	18	17	23	0	1
1	19	20	13	4	13	24	14	0	1
0	19	17	34	2	5	21	17	1	0
1	23	15	33	3	7	16	18	0	1
1	23	20	31	2	4	20	13	0	0
1	25	23	33	2	7	16	18	7	1
1	25	20	32	0	10	21	16	2	1
0	24	20	31	2	8	19	15	0	1
1	25	21	29	1	5	19	19	1	0
1	25	20	33	1	4	15	14	0	0
1	19	30	25	5	10	15	16	0	1
0	20	15	33	1	6	15	20	0	0
1	19	26	24	4	7	12	24	0	1
1	21	33	22	6	9	22	19	0	1
1	19	26	21	3	4	30	19	0	0
1	25	23	25	4	4	21	22	0	0
1	21	18	40	0	6	14	20	0	0
0	18	22	36	1	4	20	14	0	0
1	21	26	32	2	4	20	12	0	0
1	20	24	23	5	9	21	21	2	1
1	20	21	32	2	4	22	16	0	0
1	20	18	25	3	7	21	15	0	1
1	20	21	32	4	7	14	14	0	1
1	25	24	32	1	5	19	12	0	0
1	25	23	22	4	4	22	21	1	0
1	25	18	29	2	4	21	13	0	0
1	22	25	19	5	5	24	17	1	0
1	23	21	29	4	5	24	18	1	0
1	21	25	18	6	7	27	20	0	1
0	23	28	22	6	7	22	20	0	1
1	20	19	23	1	4	15	23	1	0
1	21	29	34	3	4	19	19	0	0
1	20	28	19	6	8	24	18	1	1
0	21	23	23	6	10	32	24	1	1
1	24	31	16	6	4	22	21	0	0
1	21	25	14	6	15	14	14	1	1
1	22	25	21	3	7	21	13	0	1
1	21	20	31	2	6	17	18	2	0
1	21	23	30	2	7	12	17	0	1
1	24	32	20	3	4	19	17	0	0
0	25	28	28	6	6	18	14	0	0
0	21	13	34	0	4	21	16	0	0
0	20	17	35	0	4	13	13	0	0
1	25	18	21	3	4	16	16	0	0
1	21	28	28	2	4	14	12	0	0
1	25	22	28	2	4	19	15	1	0
1	22	24	22	3	4	16	19	1	0
0	23	23	32	2	4	18	17	1	0
1	25	18	31	1	4	16	11	0	0
1	21	33	30	2	4	17	24	1	0
1	25	17	29	6	4	19	14	0	0
0	25	23	30	3	4	25	16	0	0
1	19	31	27	2	7	19	16	0	1
1	19	23	34	2	9	24	13	0	1
1	25	25	17	5	14	23	20	1	1
1	18	27	21	4	5	21	24	0	0
1	19	34	31	4	6	26	20	1	0
1	25	22	36	1	4	18	12	0	0
1	18	18	26	2	4	24	16	0	0
1	23	24	26	5	4	32	21	0	0
1	22	21	22	5	4	19	14	0	0
1	20	19	24	2	4	10	14	0	0
0	20	22	25	2	6	15	11	0	0
1	25	20	22	2	17	19	17	0	1
1	21	17	27	1	4	20	17	0	0
1	25	22	26	0	4	18	13	0	0
1	21	27	26	3	9	19	21	4	1
1	24	19	28	1	7	15	19	1	1
0	25	18	32	2	4	18	11	0	0
1	20	20	35	2	6	22	23	2	0
0	25	29	35	2	4	12	17	1	0
1	22	26	25	6	6	17	17	2	0
1	25	24	35	2	4	20	10	0	0
1	21	26	22	5	5	18	15	0	0
1	21	23	29	5	4	23	20	0	0
1	23	25	27	2	8	25	12	0	1
1	25	34	22	6	7	24	29	2	1
1	25	28	23	6	13	20	13	1	1
1	25	19	34	2	4	15	15	0	0
1	21	31	25	5	4	18	20	0	0
1	25	23	24	4	9	14	18	0	1
1	20	17	31	2	6	18	13	0	0
1	21	20	29	2	4	17	14	1	0
1	20	26	26	6	7	24	23	0	1
1	20	21	32	2	4	16	10	0	0
1	22	29	19	3	11	24	15	0	1
0	19	8	28	4	4	8	21	1	0
0	24	19	19	3	5	16	20	6	0
0	20	23	30	2	4	16	16	0	0
1	20	32	24	3	6	19	11	0	0
1	21	25	23	4	7	21	15	1	1
1	25	26	39	2	4	21	20	1	0
1	25	21	35	0	4	18	10	0	0
1	20	21	36	4	7	20	16	8	1
1	25	23	20	6	4	15	20	0	0
0	21	23	31	2	7	23	25	2	1
1	19	23	24	5	8	26	18	0	1
0	19	16	28	2	6	18	15	0	0
1	22	24	26	5	5	33	15	0	0
0	20	29	33	3	8	23	25	0	1
1	21	13	28	4	5	18	18	0	0
1	24	27	27	3	4	18	16	0	0
1	19	23	29	2	4	21	14	0	0
0	19	21	29	1	6	16	15	0	0
1	21	24	27	2	5	22	15	0	0
0	25	16	24	1	5	11	12	0	0
1	19	24	32	5	5	19	19	1	0
1	19	23	16	2	8	15	18	0	1
1	20	28	30	1	4	22	15	0	0
1	25	18	24	1	8	9	15	0	1
1	22	19	29	0	4	10	12	1	0
0	25	20	26	1	4	19	22	8	0
1	18	26	27	4	4	25	18	0	0
1	19	21	26	2	5	23	19	1	0
1	20	14	19	0	4	31	17	0	0
0	21	23	33	2	5	22	23	0	0
1	25	20	32	2	4	13	15	0	0
0	25	19	32	0	5	18	20	0	0
1	19	22	27	2	4	16	12	1	0
0	19	20	32	1	6	15	14	0	0
1	18	22	27	4	4	15	13	1	0
1	20	22	19	4	10	16	24	1	1
1	23	17	27	1	4	21	17	0	0
0	23	19	39	1	9	19	21	1	1
1	21	20	32	3	4	12	14	0	0
1	22	24	18	3	5	22	17	0	0
0	19	20	31	1	4	20	18	3	0
1	23	23	31	2	4	27	18	2	0
0	19	22	38	2	11	23	24	0	1
1	21	23	32	1	4	17	16	0	0
1	23	18	24	3	9	20	16	1	1
1	19	20	39	0	5	21	17	1	0
1	19	19	23	2	4	16	19	0	0
1	20	21	26	2	5	20	27	0	0
0	25	14	28	2	4	26	19	1	0
0	18	17	26	3	10	19	23	0	1
0	19	23	21	5	10	23	22	1	1
1	19	19	25	4	7	23	17	1	1
1	19	24	26	2	4	23	19	0	0
1	18	21	24	3	4	23	19	0	0
1	19	18	32	2	9	13	19	0	1
1	20	22	23	4	4	18	17	0	0
1	19	23	31	3	6	15	16	0	0
1	19	17	34	1	4	23	17	0	0
1	18	23	25	5	13	28	15	1	1
1	22	24	27	4	6	17	18	1	0
1	25	25	31	1	4	13	12	0	0
0	19	17	34	2	4	16	18	0	0
1	19	24	26	5	4	24	18	0	0
1	19	21	29	2	4	17	19	1	0
1	19	16	19	4	4	18	16	0	0
1	18	21	28	3	4	19	16	0	0
1	21	17	29	2	5	17	19	1	0
1	18	24	18	6	11	22	21	0	1
1	19	13	37	1	4	20	16	1	0
1	19	21	22	3	6	19	16	1	0
1	20	18	23	1	4	19	13	1	0
1	21	25	20	3	9	33	22	0	1
1	18	25	26	4	4	18	18	1	0
0	18	16	23	4	8	24	21	0	1
1	21	22	25	2	4	10	15	1	0
1	24	19	23	4	11	23	17	1	1
1	19	19	15	3	9	24	14	1	1
1	18	21	37	1	4	23	23	0	0
1	20	29	27	5	4	20	16	0	0
1	17	24	30	4	4	19	16	0	0
1	17	25	35	2	4	19	15	0	0
1	25	22	26	5	9	24	21	0	1
1	23	20	34	1	4	16	15	0	0
1	17	21	32	2	4	15	17	0	0
1	18	21	31	2	5	24	20	0	0
1	20	22	24	2	10	22	16	1	1
1	19	25	27	3	4	28	14	0	0
1	25	25	34	4	4	11	15	0	0
1	20	16	17	2	4	20	18	0	0
1	18	23	22	2	4	17	16	0	0
1	19	14	28	2	5	14	21	0	0
0	18	19	28	2	4	19	16	0	0
1	22	22	21	3	13	15	19	7	1
1	18	21	24	1	4	25	15	0	0
1	19	23	22	2	11	27	16	0	1
1	19	20	33	2	4	18	16	0	0
0	21	30	11	5	14	26	21	0	1
1	20	23	25	2	6	28	18	0	0
1	19	24	17	3	5	24	15	0	0
1	24	24	25	2	4	21	17	0	0
1	22	26	29	2	6	35	17	0	0
1	19	21	29	5	7	21	17	0	1
1	21	19	31	1	4	22	17	0	0
1	19	22	21	3	4	22	18	0	0
1	18	27	27	3	4	19	14	0	0
1	25	22	23	2	4	18	15	0	0
1	19	19	17	3	4	20	23	0	0
1	19	27	21	5	4	15	12	0	0
1	19	25	29	1	4	17	16	0	0
1	19	25	26	2	4	20	13	0	0
1	25	22	23	1	4	16	11	0	0
1	19	28	27	4	4	27	13	0	0
1	20	24	29	1	6	19	15	1	0
1	20	20	17	2	7	23	17	0	1
0	19	22	31	2	4	23	15	0	0
1	25	23	32	2	6	17	10	0	0
1	21	22	28	2	4	20	15	0	0
1	23	19	21	2	4	21	18	0	0
1	18	23	20	3	6	22	23	1	0
1	21	30	21	4	5	30	25	0	0
1	19	25	27	6	6	22	18	0	0
1	22	16	27	2	4	17	18	0	0
1	18	16	25	2	4	23	21	1	0
0	18	15	25	2	4	17	18	0	0
0	25	17	36	2	4	18	11	7	0
1	25	16	23	1	9	24	17	1	1
1	20	15	28	2	4	20	21	0	0
1	23	17	28	1	10	17	16	1	1
1	21	21	24	2	7	21	20	0	1
0	25	26	24	1	6	15	20	3	0
1	17	24	22	2	5	16	12	0	0
1	21	23	30	5	4	20	15	0	0
1	24	16	25	4	4	16	13	1	0
0	25	21	24	2	6	21	18	0	0
0	25	22	34	2	4	18	17	1	0
1	20	19	29	2	4	21	17	0	0
1	21	19	19	2	4	18	13	0	0
1	18	24	27	3	4	19	11	0	0
0	20	16	25	2	4	19	21	1	0
1	18	21	30	1	4	17	15	0	0
1	20	21	34	2	5	16	14	1	0
1	18	14	20	2	4	13	16	0	0
1	18	25	22	3	5	33	28	1	0
1	23	21	18	4	4	28	20	0	0
1	23	26	28	4	5	26	26	0	0
1	18	31	15	6	4	23	18	1	0
1	18	22	17	6	4	14	19	0	0
1	25	23	32	2	4	20	13	0	0
1	18	23	24	3	4	25	28	0	0
0	18	22	21	3	8	14	20	2	1
1	20	28	32	4	4	22	18	1	0
1	17	16	27	4	4	33	26	0	0
1	18	16	39	0	4	30	14	0	0
1	18	21	24	1	4	27	21	2	0
0	25	29	25	3	4	25	26	1	0
1	18	20	29	2	8	22	13	2	1
1	20	24	25	6	5	22	19	1	0
1	21	19	23	4	7	17	16	1	1
1	22	18	26	1	4	14	22	1	0
1	25	25	25	6	5	23	16	1	0
1	20	27	27	4	7	32	21	1	1
1	18	26	17	2	4	26	18	0	0
1	19	22	18	1	4	10	10	0	0
1	22	23	28	3	4	18	13	0	0
1	18	17	28	1	4	17	20	0	0
1	18	26	28	4	4	29	22	8	0
1	18	25	15	6	10	18	20	0	1
1	20	23	23	4	6	17	18	0	0
1	17	25	26	4	4	17	23	0	0
1	19	29	18	5	4	25	21	2	0
1	18	25	31	6	7	30	22	1	1
1	18	23	19	5	13	33	23	7	1
0	18	28	38	2	5	23	33	0	0
1	25	22	15	5	14	20	15	0	1
1	18	22	26	2	4	17	25	1	0
1	18	24	32	6	8	34	30	0	1
1	25	31	14	6	13	19	14	0	1
1	20	24	19	3	4	22	21	0	0
0	17	27	28	5	4	22	22	7	0
1	25	21	33	2	5	19	14	1	0
1	19	16	18	6	7	19	20	0	1
1	21	26	24	4	4	25	17	7	0
1	18	14	23	1	5	23	16	0	0
1	22	20	25	3	4	23	25	0	0
1	18	27	22	3	6	30	19	1	0
0	18	25	35	2	4	18	11	0	0
0	18	18	36	3	4	18	12	0	0
1	22	17	29	1	4	17	13	1	0
1	25	22	24	3	6	25	12	1	0
0	20	14	38	4	4	20	17	0	0
1	17	21	30	3	4	16	23	1	0
1	18	24	26	1	4	23	13	0	0
0	18	15	13	3	4	24	20	0	0
1	18	17	26	1	4	16	12	0	0
1	18	15	38	0	4	12	16	0	0
0	25	19	26	2	6	17	14	1	0
0	25	23	36	1	4	10	12	0	0
1	25	25	40	3	7	16	16	1	1
1	20	17	25	2	5	18	14	0	0
1	21	20	34	2	7	16	14	0	1
0	25	21	30	3	6	20	18	8	0
1	18	18	20	2	5	21	21	1	0
1	21	33	32	6	10	25	17	0	1
1	17	22	12	4	10	23	23	0	1
1	18	23	22	1	4	21	12	0	0
0	17	20	31	3	5	16	20	0	0
1	25	32	37	5	4	22	16	0	0
1	25	22	33	2	4	15	10	0	0
